# Supplementary material for: Effect of solvent polarity on the photophysical properties of chalcone derivatives
Source: Royal Society of Chemistry journal article supplement (doi:10.1039/c7ra01705g), 2017-01-01
Supplement: c7ra01705g1.pdf [file c7ra01705g1.pdf]

## Electronic supplementary Information (ESI)

Table S1 Spectroscopic data of AFPO in different solvents.

| Solvents           | $\lambda_a$ (nm) | $\bar{\nu}_a$ (cm <sup>-1</sup> ) <sup>a</sup> | $\lambda_f$ (nm) | $\bar{\nu}_f$ (cm <sup>-1</sup> ) <sup>b</sup> | $\Delta\bar{\nu}$ (cm <sup>-1</sup> ) <sup>c</sup> | $\bar{\nu}_a + \bar{\nu}_f/2$ (cm <sup>-1</sup> ) <sup>d</sup> | $\bar{\nu}_a + \bar{\nu}_f$ (cm <sup>-1</sup> ) |
|--------------------|------------------|------------------------------------------------|------------------|------------------------------------------------|----------------------------------------------------|----------------------------------------------------------------|-------------------------------------------------|
| Hexane             | 348              | 28735                                          | 420              | 23809                                          | 4926                                               | 26272                                                          | 52545                                           |
| p-xylene           | 349              | 28653                                          | 423              | 23640                                          | 4956                                               | 26146                                                          | 52293                                           |
| Toluene            | 352              | 28409                                          | 428              | 23364                                          | 4934                                               | 25886                                                          | 51773                                           |
| Ether              | 352              | 28409                                          | 429              | 23310                                          | 5099                                               | 25859                                                          | 51719                                           |
| Diethylamine       | 356              | 28089                                          | 434              | 23041                                          | 5048                                               | 25565                                                          | 51131                                           |
| 1,4-Dioxane        | 357              | 28011                                          | 435              | 22988                                          | 5022                                               | 25499                                                          | 50999                                           |
| Chlorobenzene      | 359              | 27855                                          | 440              | 22727                                          | 5127                                               | 25291                                                          | 50582                                           |
| Tetrahydrofuran    | 362              | 27624                                          | 446              | 22421                                          | 5202                                               | 25022                                                          | 50045                                           |
| Ethyl acetate      | 362              | 27624                                          | 446              | 22421                                          | 5202                                               | 25022                                                          | 50045                                           |
| Chloroform         | 360              | 27777                                          | 442              | 22624                                          | 5153                                               | 25201                                                          | 50402                                           |
| Dichloromethane    | 364              | 27472                                          | 449              | 22271                                          | 5200                                               | 24872                                                          | 49744                                           |
| Dimethyl formamide | 364              | 27472                                          | 452              | 22123                                          | 5348                                               | 24798                                                          | 49596                                           |
| Dimethylsulphoxide | 365              | 27397                                          | 456              | 21929                                          | 5467                                               | 24663                                                          | 49327                                           |
| Acetonitrile       | 368              | 27173                                          | 459              | 21786                                          | 5387                                               | 24480                                                          | 48960                                           |
| Butanol            | 372              | 26881                                          | 464              | 21551                                          | 5329                                               | 24216                                                          | 48433                                           |
| Propanol           | 375              | 26666                                          | 469              | 21321                                          | 5344                                               | 23994                                                          | 47988                                           |
| Ethanol            | 376              | 26595                                          | 472              | 21186                                          | 5409                                               | 23891                                                          | 47782                                           |
| Methanol           | 378              | 26455                                          | 476              | 21008                                          | 5446                                               | 23731                                                          | 47463                                           |

<sup>a</sup> Absorption maxima.

<sup>b</sup> Fluorescence maxima.

<sup>c</sup> Stokes shift.

<sup>d</sup> Arithmetic mean of absorption maxima and fluorescence maxima.

Table S2 Spectroscopic data of FHPO in different solvents.

| Solvents           | $\lambda_a$ (nm) | $\bar{\nu}_a$ (cm <sup>-1</sup> ) <sup>a</sup> | $\lambda_f$ (nm) | $\bar{\nu}_f$ (cm <sup>-1</sup> ) <sup>b</sup> | $\Delta\bar{\nu}$ (cm <sup>-1</sup> ) <sup>c</sup> | $\bar{\nu}_a + \bar{\nu}_f/2$ (cm <sup>-1</sup> ) <sup>d</sup> | $\bar{\nu}_a + \bar{\nu}_f$ (cm <sup>-1</sup> ) |
|--------------------|------------------|------------------------------------------------|------------------|------------------------------------------------|----------------------------------------------------|----------------------------------------------------------------|-------------------------------------------------|
| Hexane             | 350              | 28571                                          | 425              | 23529                                          | 5042                                               | 26050                                                          | 52100                                           |
| p-xylene           | 352              | 28409                                          | 428              | 23364                                          | 5044                                               | 25886                                                          | 51773                                           |
| Toluene            | 353              | 28328                                          | 430              | 23255                                          | 5072                                               | 25792                                                          | 51584                                           |
| Ether              | 356              | 28089                                          | 435              | 22988                                          | 5101                                               | 25539                                                          | 51078                                           |
| Diethylamine       | 357              | 28011                                          | 438              | 22831                                          | 5180                                               | 25421                                                          | 50842                                           |
| 1,4-Dioxane        | 359              | 27855                                          | 440              | 22727                                          | 5127                                               | 25291                                                          | 50582                                           |
| Chlorobenzene      | 362              | 27624                                          | 446              | 22421                                          | 5202                                               | 25022                                                          | 50045                                           |
| Tetrahydrofuran    | 362              | 27624                                          | 447              | 22371                                          | 5252                                               | 24997                                                          | 49995                                           |
| Ethyl acetate      | 363              | 27548                                          | 448              | 22321                                          | 5226                                               | 24934                                                          | 49869                                           |
| Chloroform         | 364              | 27472                                          | 450              | 22222                                          | 5250                                               | 24847                                                          | 49694                                           |
| Dichloromethane    | 366              | 27322                                          | 454              | 22026                                          | 5295                                               | 24674                                                          | 49348                                           |
| Dimethyl formamide | 369              | 27100                                          | 459              | 21786                                          | 5313                                               | 24443                                                          | 48886                                           |
| Dimethylsulphoxide | 370              | 27027                                          | 462              | 21645                                          | 5382                                               | 24336                                                          | 48672                                           |
| Acetonitrile       | 371              | 26954                                          | 464              | 21551                                          | 5402                                               | 24252                                                          | 48505                                           |
| Butanol            | 372              | 26881                                          | 466              | 21459                                          | 5422                                               | 24170                                                          | 48340                                           |
| Propanol           | 375              | 26666                                          | 472              | 21186                                          | 5480                                               | 23926                                                          | 47853                                           |
| Ethanol            | 377              | 26525                                          | 476              | 21008                                          | 5516                                               | 23766                                                          | 47533                                           |
| Methanol           | 379              | 26385                                          | 480              | 20833                                          | 5551                                               | 23609                                                          | 47218                                           |

<sup>a</sup> Absorption maxima.

<sup>b</sup> Fluorescence maxima.

<sup>c</sup> Stokes shift.

<sup>d</sup> Arithmetic mean of absorption maxima and fluorescence maxima.

Table S3 Kamlet-Abboud-Taft solvent parameters.

| Solvents           | $\alpha$ | $\beta$ | $\pi^*$ |
|--------------------|----------|---------|---------|
| Hexane             | 0        | 0       | -0.11   |
| p-xylene           | 0        | 0       | 0.43    |
| Toluene            | 0        | 0.11    | 0.54    |
| Ether              | 0        | 0.47    | 0.24    |
| Diethylamine       | 0        | 0.71    | 0.09    |
| 1,4-Dioxane        | 0        | 0.37    | 0.55    |
| Chlorobenzene      | 0        | 0.07    | 0.68    |
| Tetrahydrofuran    | 0        | 0.55    | 0.58    |
| Ethyl acetate      | 0        | 0.45    | 0.55    |
| Chloroform         | 0.2      | 0.1     | 0.69    |
| Dichloromethane    | 0.3      | 0       | 0.82    |
| Dimethyl formamide | 0        | 0.69    | 0.88    |
| Dimethylsulphoxide | 0        | 0.76    | 1       |
| Acetonitrile       | 0.19     | 0.31    | 0.75    |
| Butanol            | 0.79     | 0.88    | 0.47    |
| Propanol           | 0.76     | 0.84    | 0.48    |
| Ethanol            | 0.83     | 0.77    | 0.54    |
| Methanol           | 0.93     | 0.62    | 0.6     |

Table S4 Catalan solvent parameters.

| Solvents           | SA    | SB    | SP    | SdP   |
|--------------------|-------|-------|-------|-------|
| Hexane             | 0     | 0.056 | 0.616 | 0.519 |
| p-xylene           | 0     | 0.16  | 0.778 | 0.175 |
| Toluene            | 0     | 0.128 | 0.782 | 0.284 |
| Ether              | 0     | 0.562 | 0.617 | 0.385 |
| Diethylamine       | 0     | 0.885 | 0.66  | 0.617 |
| 1,4-Dioxane        | 0     | 0.444 | 0.737 | 0.312 |
| Chlorobenzene      | 0     | 0.182 | 0.833 | 0.537 |
| Tetrahydrofuran    | 0     | 0.591 | 0.714 | 0.634 |
| Ethyl acetate      | 0     | 0.542 | 0.656 | 0.603 |
| Chloroform         | 0.047 | 0.071 | 0.783 | 0.614 |
| Dichloromethane    | 0.04  | 0.178 | 0.761 | 0.769 |
| Dimethyl formamide | 0.031 | 0.613 | 0.759 | 0.977 |
| Dimethylsulphoxide | 0.83  | 1.000 | 0.072 | 0.647 |
| Acetonitrile       | 0.044 | 0.286 | 0.645 | 0.974 |
| Butanol            | 0.341 | 0.809 | 0.674 | 0.655 |
| Propanol           | 0.367 | 0.782 | 0.658 | 0.748 |
| Ethanol            | 0.4   | 0.658 | 0.633 | 0.783 |
| Methanol           | 0.605 | 0.545 | 0.608 | 0.904 |

Figure S1 Solvatochromic linear plots of AFPO.

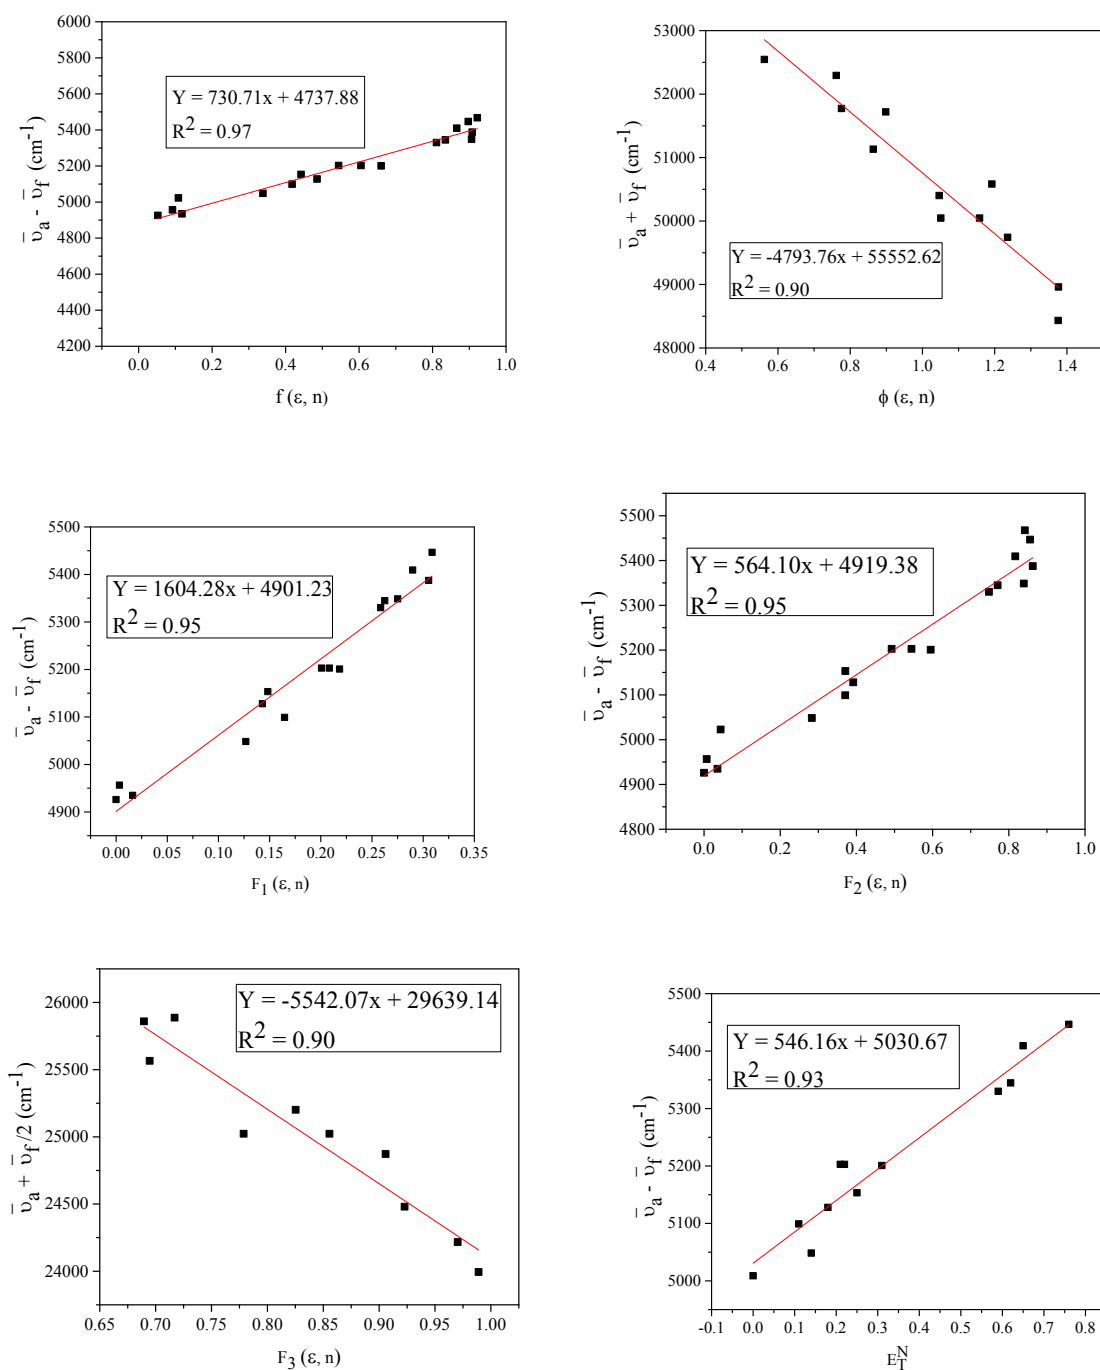

Solvatochromic linear plots of  $\bar{\nu}_a - \bar{\nu}_f$  vs  $f(\epsilon, n)$ ,  $\bar{\nu}_a + \bar{\nu}_f$  vs  $\phi(\epsilon, n)$  (Bilot-Kawski),  $(\bar{\nu}_a - \bar{\nu}_f)$  vs  $F_1(\epsilon, n)$  (Lippert-Mataga),  $F_2(\epsilon, n)$  (Bakhshiev),  $(\bar{\nu}_a + \bar{\nu}_f)/2$  vs  $F_3(\epsilon, n)$  (Kawski-Chamma-Viallet) and  $(\bar{\nu}_a - \bar{\nu}_f)$  vs  $E_T^N(\epsilon, n)$  (Reichardt) for AFPO.

Figure S2 Solvatochromic linear plots of FHPO.

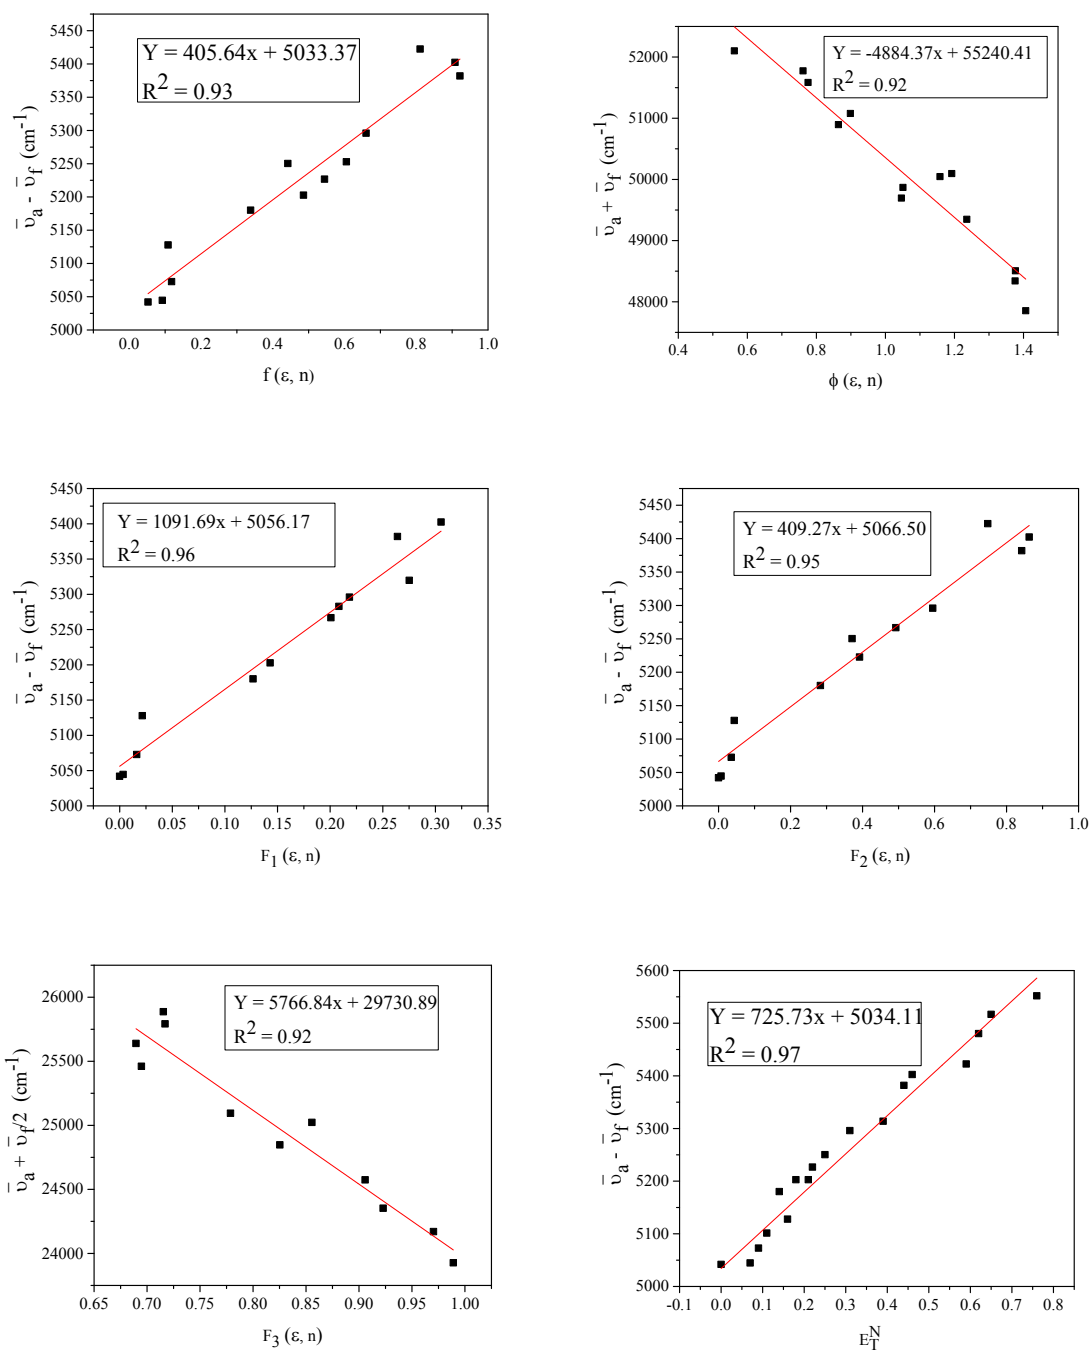

Solvatochromic linear plots of  $\bar{\nu}_a - \bar{\nu}_f$  vs  $f(\epsilon, n)$ ,  $\bar{\nu}_a + \bar{\nu}_f$  vs  $\phi(\epsilon, n)$  (Bilot-Kawski),  $(\bar{\nu}_a - \bar{\nu}_f)$  vs  $F_1(\epsilon, n)$  (Lippert-Mataga),  $F_2(\epsilon, n)$  (Bakhshiev),  $(\bar{\nu}_a + \bar{\nu}_f)/2$  vs  $F_3(\epsilon, n)$  (Kawski-Chamma-Viallet) and  $(\bar{\nu}_a - \bar{\nu}_f)$  vs  $E_T^N(\epsilon, n)$  (Reichardt) for FHPO.

Figure S3 Mulliken charge density of FNPO, AFPO and FHPO

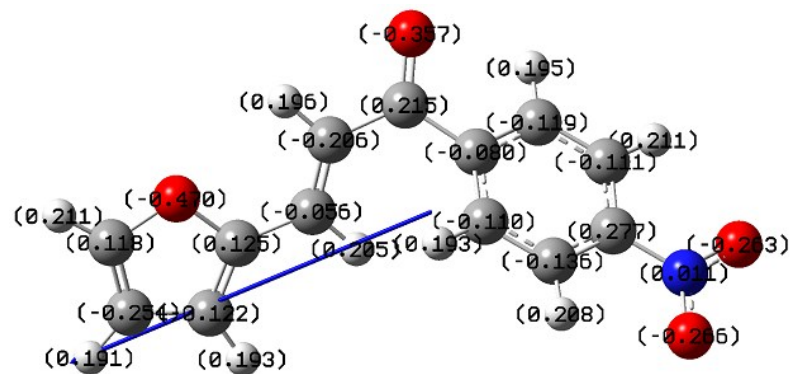

FNPO

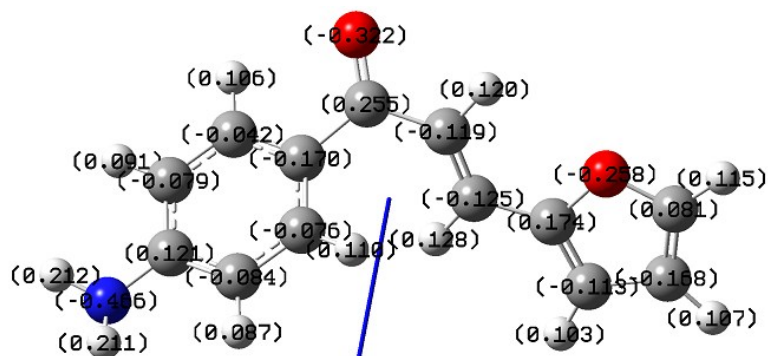

AFPO

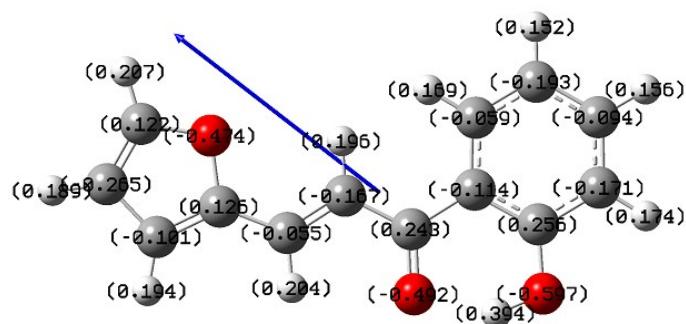

FHPO
